# Supplementary material for: Comparison of Current Methods for Signal Peptide Prediction in Phytoplasmas
Source: Front Microbiol. 2021 Mar 25;12:661524. doi: 10.3389/fmicb.2021.661524 (PMC8026896; doi:10.3389/fmicb.2021.661524)
Supplement: Supplementary Table 11 — List of Amp accessions used in this study. [file Table_11.xlsx]

## Sheet: Feuil1
Supplementary Table S11
List of Amp accessions used in this study.
Organism	Strain	Protein accession
Aster yellows witches'-broom phytoplasma AYWB	AYWB	WP_011412878.1
New Jersey aster yellows phytoplasma	NJAY	PEH36148.1
Wheat blue dwarf phytoplasma		WP_024563332.1
Clover phyllody phytoplasma		AAK28355.1
Potato purple top phytoplasma	PPT	AAK28355.1
Mulberry dwarf phytoplasma	MD	BAE93534.1
Onion yellows phytoplasma	OY-NIM	BAE93530.1
Onion yellows phytoplasma	OY-M	BAE93526.1
Aster yellows phytoplasma		AAK28353.1
Lettuce yellows phytoplasma		BAE93558.1
Rice orange leaf phytoplasma	LD1	WP_071345415.1
'Brassica napus' phytoplasma		AHB59521.1
'Catharanthus roseus' aster yellows phytoplasma	De Villa	WP_130427904.1
'Primula acaulis' yellows phytoplasma		AJD81806.1
Chinaberry witches'-broom phytoplasma		ADC54994.1
Chrysanthemum yellows phytoplasma	CYP	WP_034172058.1
Hydrangea phyllody phytoplasma	HP	BAN57413.1
Onion yellows phytoplasma OY-M		Q7M1T6.3
Onion yellows phytoplasma OY-M	onion yellows	Q7M1T6.3
Sumac witches'-broom phytoplasma		BAE93570.1
Rhus yellows phytoplasma	RhY	BAE93570.1
Periwinkle leaf yellowing phytoplasma	PLY	ADD52246.1
'Chrysanthemum coronarium' phytoplasma	OY-V	WP_052360409.1
Onion yellows phytoplasma		WP_052360409.1
Onion yellows phytoplasma	OY-W	WP_052360409.1
Periwinkle leaf yellowing phytoplasma		WP_052360409.1
Eggplant dwarf phytoplasma		BAE93550.1
Iceland poppy yellows phytoplasma		BAE93562.1
Marguerite yellows phytoplasma		BAE93566.1
Tomato yellows phytoplasma		BAE93554.1
Paulownia witches'-broom phytoplasma		ABF61857.1
Paulownia witches'-broom phytoplasma	YL07	ABF61857.1
Paulownia witches'-broom phytoplasma	PaWB-Taiwan	ABF61857.1
Paulownia witches'-broom phytoplasma	PaWB	ABF61857.1
Maize bushy stunt phytoplasma	M3	WP_069028371.1
Lethal wilt oil palm phytoplasma	OP47	WP_069028371.1
Maize bushy stunt phytoplasma		WP_069028371.1
Porcelain vine witches'-broom phytoplasma		BAE93574.1
Phytoplasma sp. AYBG	AYBG	BAE93542.1
Mulberry yellow dwarf phytoplasma	MYD-AnH	ADM86705.1
Rapeseed phyllody phytoplasma		QKX95275.1
Chrysanthemum yellows phytoplasma	CY	ABG79542.1
Candidatus Phytoplasma australiense		WP_012359208.1
Strawberry lethal yellows phytoplasma (CPA) str. NZSb11	NZSb11	WP_015638088.1
Candidatus Phytoplasma japonicum	JHP	BAG16385.1
Candidatus Phytoplasma solani	SA-1	WP_122225418.1
Candidatus Phytoplasma solani		WP_122225418.1
Candidatus Phytoplasma solani	CrHo12_601	WP_122225418.1
Candidatus Phytoplasma solani	San23_2015	WP_122225418.1
Candidatus Phytoplasma solani		AIZ66953.1
Candidatus Phytoplasma solani	San24_2015	AIZ66953.1
Candidatus Phytoplasma solani		AIZ66954.1
Candidatus Phytoplasma solani		AKR18038.1
Candidatus Phytoplasma solani	San8_2016	AVQ05133.1
Candidatus Phytoplasma solani		AIZ66958.1
Candidatus Phytoplasma solani		AGK63513.1
Candidatus Phytoplasma solani	Vv12_Kn6	AGK63513.1
Candidatus Phytoplasma solani	Br8	AGK63513.1
Candidatus Phytoplasma solani	231/09	AGK63513.1
Candidatus Phytoplasma solani	San29_2016	AVQ05137.1
Candidatus Phytoplasma solani		AGK63512.1
Candidatus Phytoplasma solani		AIZ66918.1
Candidatus Phytoplasma solani		AGK63515.1
Candidatus Phytoplasma solani	CrAr12_722_2	AGK63515.1
Candidatus Phytoplasma solani		ANA11641.1
Candidatus Phytoplasma solani		AKR18034.1
Candidatus Phytoplasma solani		AKR18043.1
Candidatus Phytoplasma solani		AJF83913.1
Candidatus Phytoplasma solani	San3_2015	AVQ05127.1
Candidatus Phytoplasma solani	San6_2016	AVQ05132.1
Candidatus Phytoplasma solani	San28_2016	AVQ05136.1
Candidatus Phytoplasma solani	Carv1	AMV75264.1
Candidatus Phytoplasma solani		SNR20497.1
Candidatus Phytoplasma solani	San10_2015	AVQ05130.1
Candidatus Phytoplasma solani		SNR20525.1
Candidatus Phytoplasma solani		AKK23553.1
Candidatus Phytoplasma solani		AFN67015.1
Candidatus Phytoplasma solani		CBL82424.1
Candidatus Phytoplasma solani	San45_2016	AVQ05138.1
Candidatus Phytoplasma solani		SPN69340.1
Candidatus Phytoplasma solani		AVA29660.1
Candidatus Phytoplasma solani	San21_2015	AVA29660.1
Candidatus Phytoplasma solani	San16_2016	AVA29660.1
Candidatus Phytoplasma solani	San17_2016	AVA29660.1
Candidatus Phytoplasma solani		CBL82419.1
Candidatus Phytoplasma solani	Char7	AMV75266.1
Candidatus Phytoplasma solani		AMV75266.1
Candidatus Phytoplasma solani	San4_2015	AVQ05128.1
Candidatus Phytoplasma solani		SNR20549.1
Candidatus Phytoplasma solani	Tsol89	AMV75270.1
Candidatus Phytoplasma solani		AMV75270.1
Candidatus Phytoplasma solani		CBL82416.1
Candidatus Phytoplasma solani	Amla77	AMV75268.1
Candidatus Phytoplasma solani		SNR20510.1
Candidatus Phytoplasma solani		SNR20512.1
Candidatus Phytoplasma solani		AGK63505.1
Candidatus Phytoplasma solani		CBL82413.1
Candidatus Phytoplasma solani		SNR20504.1
Candidatus Phytoplasma solani		AIZ66922.1
Candidatus Phytoplasma solani	San2_2015	AIZ66922.1
Candidatus Phytoplasma solani	San6_2015	AVQ05129.1
Candidatus Phytoplasma solani	MK94	AHU86404.1
Candidatus Phytoplasma solani	CrHo12_650	AHU86404.1
Candidatus Phytoplasma solani		AHU86404.1
Candidatus Phytoplasma solani	GBr2	AHU86404.1
Candidatus Phytoplasma solani	GBr4	AHU86404.1
Candidatus Phytoplasma solani	GVu1	AHU86404.1
Candidatus Phytoplasma solani	GVu2	AHU86404.1
Candidatus Phytoplasma solani	H17	AHU86404.1
Candidatus Phytoplasma solani	H18	AHU86404.1
Candidatus Phytoplasma solani	H21	AHU86404.1
Candidatus Phytoplasma solani	Char8	AMV75267.1
Candidatus Phytoplasma solani		AMV75267.1
Candidatus Phytoplasma solani		AFN67010.1
Candidatus Phytoplasma solani	Vv12_274	AII01983.1
Candidatus Phytoplasma solani		AGK63511.1
Candidatus Phytoplasma solani	MK66	AGK63511.1
Candidatus Phytoplasma solani	Vv12_751	AGK63511.1
Candidatus Phytoplasma solani	284/09	AGK63511.1
Candidatus Phytoplasma solani	Carv2	AMV75265.1
Candidatus Phytoplasma solani		SNR20508.1
Candidatus Phytoplasma solani		AKK23556.1
Candidatus Phytoplasma solani		AFN67013.1
Candidatus Phytoplasma solani		AFN67012.1
Candidatus Phytoplasma solani	CrHo13_1183	AFN67012.1
Candidatus Phytoplasma solani		AIZ66964.1
Candidatus Phytoplasma solani		AFN67011.1
Candidatus Phytoplasma solani	Ho13_1006	AFN67011.1
Candidatus Phytoplasma solani		AFN67016.1
Candidatus Phytoplasma solani	MK44	AFN67016.1
Candidatus Phytoplasma solani		AFN67014.1
Candidatus Phytoplasma solani	Ho13_838	AFN67014.1
Candidatus Phytoplasma solani		AKK23550.1
Candidatus Phytoplasma solani		AKK23549.1
Candidatus Phytoplasma solani	San22_2015	AVQ05131.1
Candidatus Phytoplasma solani		AKK23552.1
Candidatus Phytoplasma solani		QKI31753.1
Candidatus Phytoplasma solani	Sabu84	AMV75269.1
Candidatus Phytoplasma meliae		AYP64681.1
Candidatus Phytoplasma meliae		AYP64683.1
Candidatus Phytoplasma meliae		AYP64682.1
Candidatus Phytoplasma meliae		AYP64688.1
Candidatus Phytoplasma meliae		AYP64687.1
Candidatus Phytoplasma meliae		AYP64686.1
Candidatus Phytoplasma meliae		AYP64684.1
Candidatus Phytoplasma meliae		AYP64679.1
Candidatus Phytoplasma meliae		AYP64680.1
Candidatus Phytoplasma meliae		AYP64685.1
Candidatus Phytoplasma meliae		AYP64676.1
Candidatus Phytoplasma meliae		AYP64678.1
